# Supplementary material for: Accessory Genomic Epidemiology of Cocirculating Acinetobacter baumannii Clones
Source: PubMed Central journal article supplement (PMC8407383; doi:10.1128/msystems.00626-21), 2021-07-20

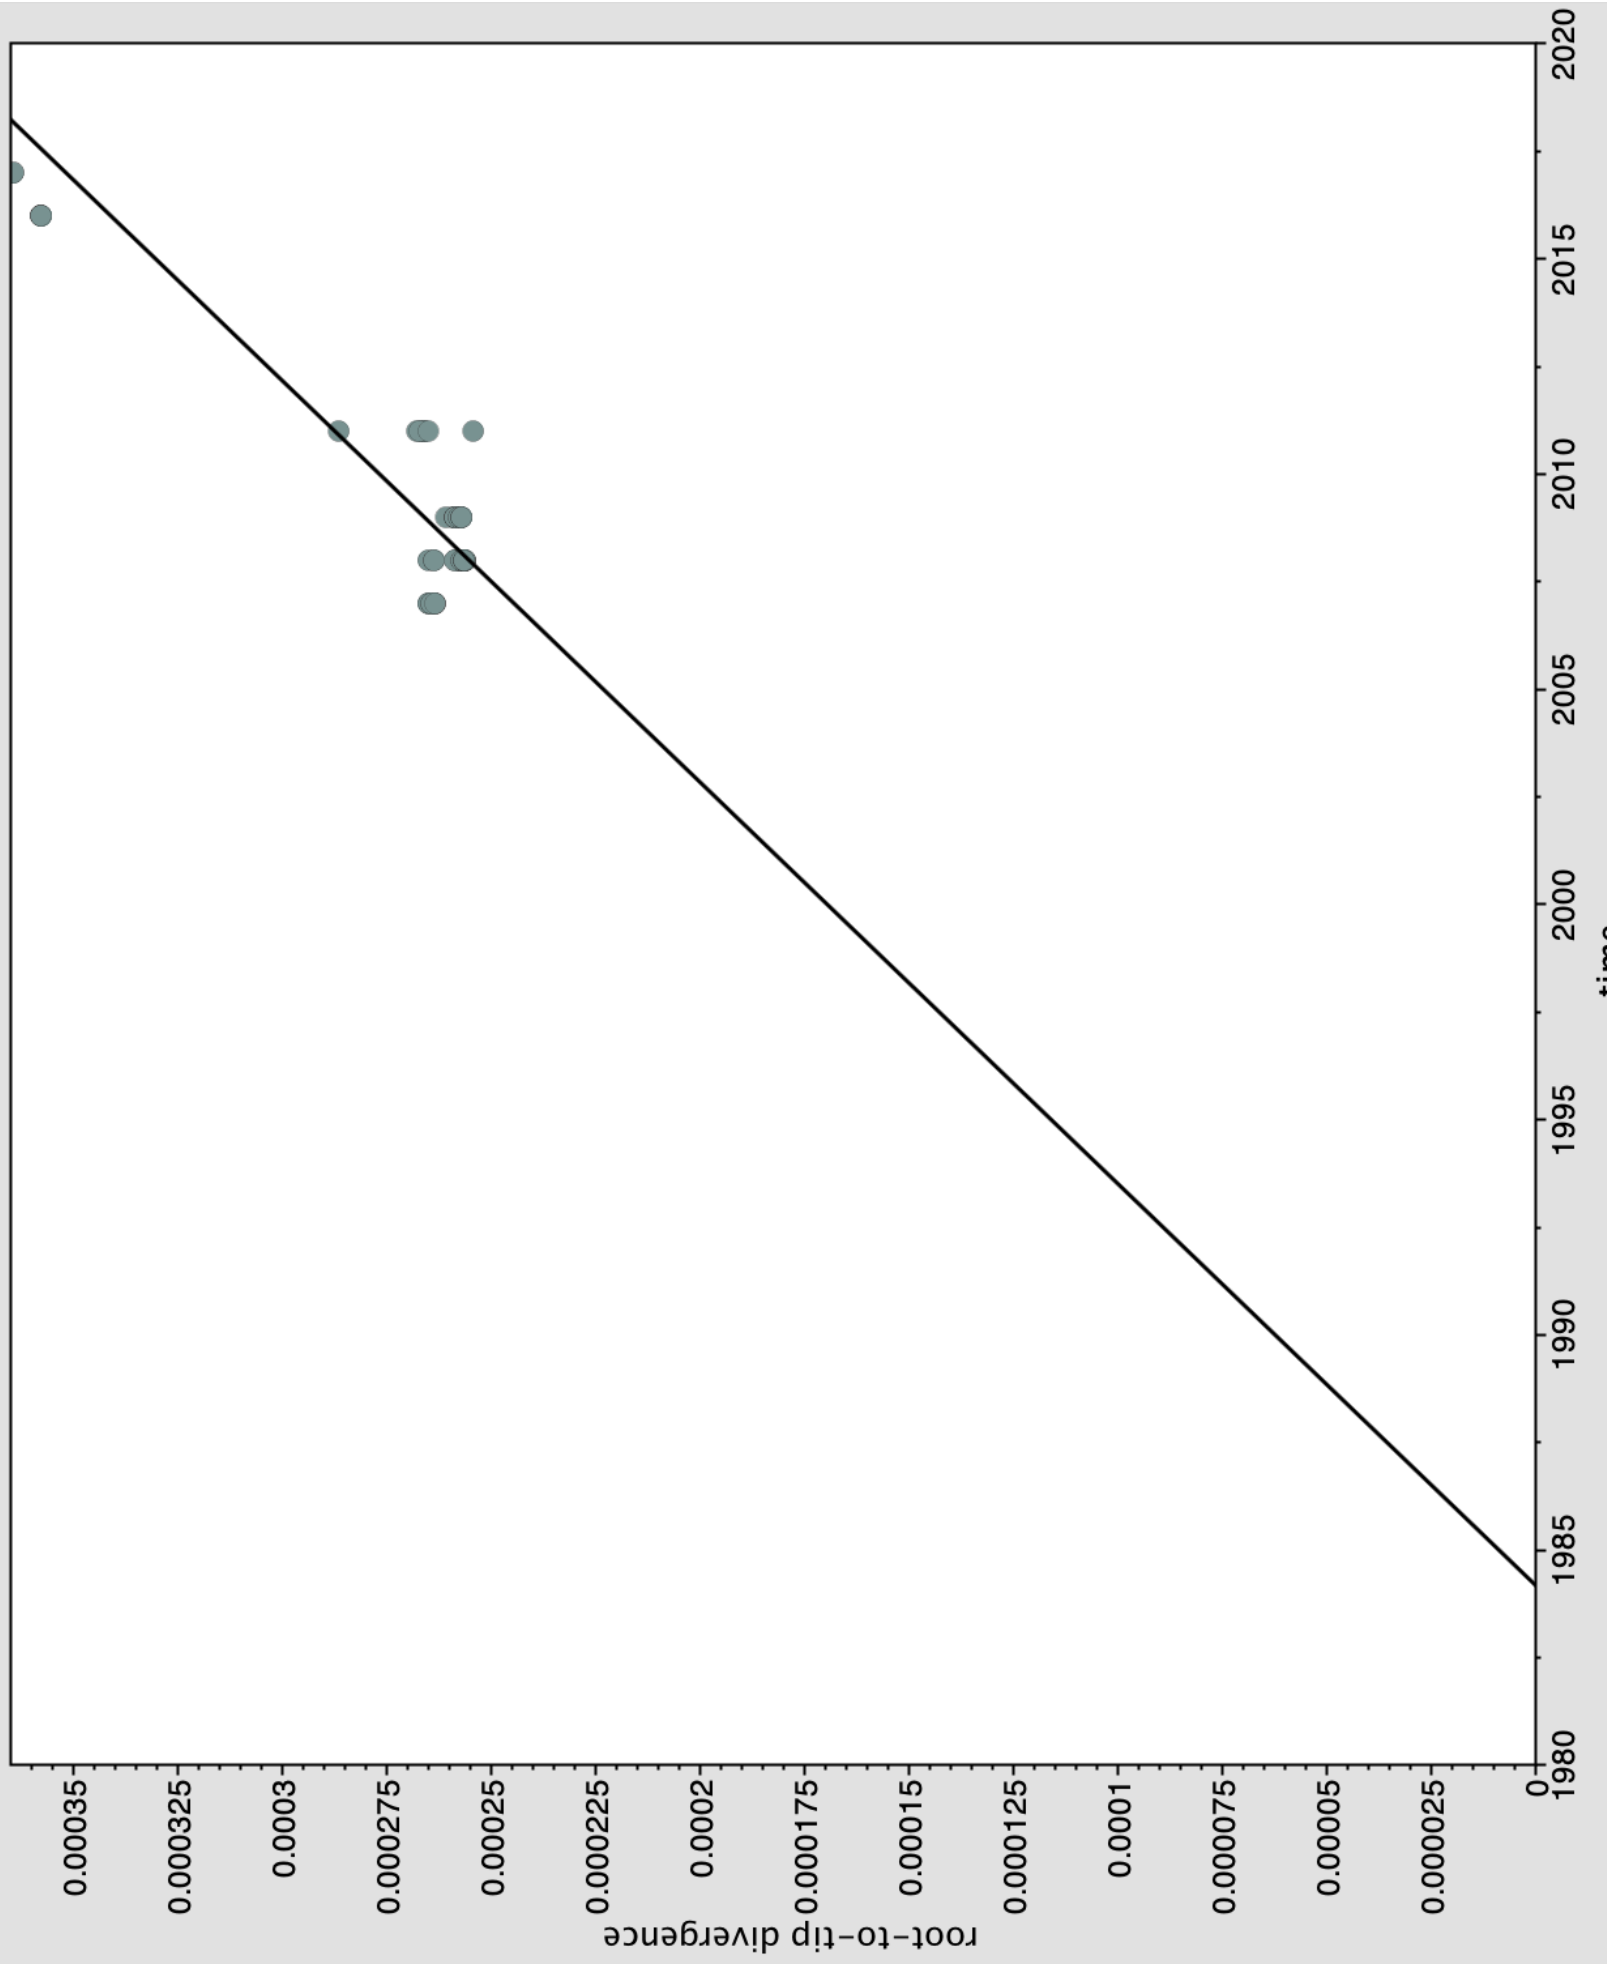

Supplement: msystems.00626-21-sf001.pdf [file msystems.00626-21-sf001.pdf]
